# Supplementary material
Source: PubMed Central journal article supplement (PMC4567462)
Supplement: supp_WNL.0000000000001933_Tables.pdf [file supp_WNL.0000000000001933_Tables.pdf]

**Table e-1:** Events rates for dual antiplatelet vs aspirin alone

|                                              | <b>Dual therapy<br/>(aspirin and<br/>clopidogrel)</b> | <b>Single therapy<br/>(aspirin)</b> | <b>p Value<sup>a</sup></b> |
|----------------------------------------------|-------------------------------------------------------|-------------------------------------|----------------------------|
| <b>Recurrent ischemic<br/>stroke (n=240)</b> | n, events/year (95% CI)                               | n, events/year (95% CI)             |                            |
| Neither                                      | 30, 1.3 (0.90, 1.9)                                   | 42, 2.0 (1.4, 2.6)                  |                            |
| METS only                                    | 22, 1.6 (1.0, 2.4)                                    | 25, 1.8 (1.2, 2.6)                  |                            |
| DM only                                      | 8, 2.7 (1.2, 4.9)                                     | 6, 1.9 (0.71, 3.8)                  |                            |
| Both                                         | 46, 2.9 (2.1, 3.8)                                    | 61, 3.6 (2.7, 4.5)                  | 0.64                       |
| <b>Incident MI (n=74)</b>                    |                                                       |                                     |                            |
| Neither                                      | 9, 0.39 (0.18, 0.68)                                  | 7, 0.31 (0.13, 0.58)                |                            |
| METS only                                    | 6, 0.43 (0.16, 0.84)                                  | 12, 0.84 (0.44, 1.4)                |                            |
| DM only                                      | 4, 1.3 (0.35, 2.8)                                    | 3, 0.96 (0.20, 2.3)                 |                            |
| Both                                         | 14, 0.84 (0.46, 1.3)                                  | 19, 1.3 (0.62, 1.6)                 | 0.53                       |

Abbreviations: METS = metabolic syndrome; DM = diabetes mellitus; MI = myocardial infarct.

<sup>a</sup>Calculated by Wald test for overall differences.

**Table e-2:** Events rates for of blood pressure target

|                                          | <b>Higher<br/>(SBP 130-139mmHg)</b> | <b>Lower<br/>(SBP&lt;130mmHg)</b> | <b>p Value<sup>a</sup></b> |
|------------------------------------------|-------------------------------------|-----------------------------------|----------------------------|
| <b>Recurrent ischemic stroke (n=240)</b> | n, events/year (95% CI)             | n, events/year (95% CI)           |                            |
| Neither                                  | 34, 1.6 (1.1, 2.2)                  | 38, 1.7 (1.2, 2.3)                |                            |
| METS only                                | 29, 2.1 (1.4, 2.9)                  | 18, 1.3 (0.80, 2.0)               |                            |
| DM only                                  | 8, 2.9 (1.2, 5.1)                   | 6, 1.9 (0.68, 3.6)                |                            |
| Both                                     | 57, 3.5 (2.7, 4.5)                  | 50, 3.0 (2.3, 3.9)                | 0.56                       |
| <b>Incident MI (n=74)</b>                |                                     |                                   |                            |
| Neither                                  | 8, 0.36 (0.16, 0.65)                | 8, 0.34 (0.15, 0.62)              |                            |
| METS only                                | 11, 0.76 (0.38, 1.3)                | 7, 0.51 (0.21, 0.96)              |                            |
| DM only                                  | 5, 1.7 (0.55, 3.5)                  | 2, 0.60 (0.073, 1.7)              |                            |
| Both                                     | 15, 1.0 (0.61, 1.5)                 | 18, 1.0 (0.61, 1.5)               | 0.55                       |

Abbreviations: METS = metabolic syndrome; DM = diabetes mellitus; MI = myocardial infarct.

<sup>a</sup>Calculated by Wald test for overall differences.
